# Supplementary material
Source: publisher figshare collection journal article supplement (https://acs.figshare.com/ndownloader/files/4507375)
Supplement: Supplementary file 1 [file 4507375]

## Supporting Information

# Titanium(IV) Complexes with N,N'-dialkyl-2,3-dihydroxyterephthalamides and 1-hydroxy-2(1H)-pyridinone as Siderophore and Tunichrome Analogues

Ritika Uppal, Hayley P. Israel, Christopher D. Incarvito, Ann M. Valentine\*

*\*Department of Chemistry, Yale University, P. O. Box 208107, New Haven, Connecticut 06520-8107.*

### Table of Contents

**Figure S1.** Linear tetramers of potassium ions, the core repeating component of the structure of complex **1**.

**Figure S2.** Intra-molecular hydrogen bonding between the N-H $\cdots$ O(catechol) in the structure of complex **1**.

**Figure S3.** Structure of Na<sub>2</sub>[Ti(etTAM)<sub>3</sub>] (**3**) complex. The R-factor is >15%, hence the structure was only used to illustrate the connectivity of the ligands to the Ti.

**Figure S4.** ESI-MS of complex **3** in water showing peaks consistent with titanium isotope distributions for Na<sub>2</sub>H[Ti(etTAM)<sub>3</sub>]<sup>+</sup> (peaks ~845.5 m/z). Experimental spectrum, solid line; simulated titanium isotope distributions, dashed line.

**Figure S5.** Cyclic voltammetric trace of 4 mM complex **1** in 20% MeCN/80% H<sub>2</sub>O in the presence of 0.1 M KNO<sub>3</sub> using a hanging mercury drop electrode.

**Figure S6.** ESI-MS of complex **2** in water showing peaks consistent with titanium isotope distributions for (a)  $\text{Na}_2\text{H}[\text{Ti}(\text{meTAM})_2(\text{OCH}_3)_2]^+$  (peaks  $\sim 601$  m/z) where the  $\text{Na}^+$  are provided by the instrument and (b)  $\text{K}_3[\text{Ti}(\text{meTAM})_3]^+$  (peaks  $\sim 831$  m/z). Experimental spectrum, solid line; simulated titanium isotope distributions, dashed line.

**Figure S7.** ESI-MS of complex **4** in water showing peaks consistent with titanium isotope distributions for  $\text{Na}_3[\text{Ti}(\text{meTAM})_3]^+$  (peaks  $\sim 783$  m/z). Experimental spectrum, solid line; simulated titanium isotope distributions, dashed line.

**Figure S8.** The structure showing pseudo-two-fold axis of rotation of complex **5**.

**Figure S9.** Ball and stick model showing  $\pi$ -stacking between the phenyl rings of different molecules in the X-ray crystal structure of complex **5**.

**Figure S10.** ESI-MS of complex **5** in water showing peaks consistent with titanium isotope distributions for (a)  $\text{Na}[\text{Ti}(\text{1,2-HOPO})_2(\text{OCH}_3)_2]^+$  (peaks  $\sim 353$  m/z), (b)  $[\text{Ti}(\text{1,2-HOPO})_3]^+$  (peaks  $\sim 378$  m/z) and (c)  $[\text{Ti}_2(\text{1,2-HOPO})_4(\text{OCH}_3)(\text{OH})(\text{acac})]^+$  (peaks  $\sim 683$  m/z). Experimental spectrum, solid line; simulated titanium isotope distributions, dashed line.

**Figure S11.** Ball and stick model showing the hypothetical binding of Mm-1 to Ti(IV). Spheres in the structure represent; purple, titanium; red, oxygen; grey, carbon; blue, nitrogen. Hydrogen atoms are not shown in the figure. The energy was minimized using the molecular mechanics algorithm in Chem 3D.

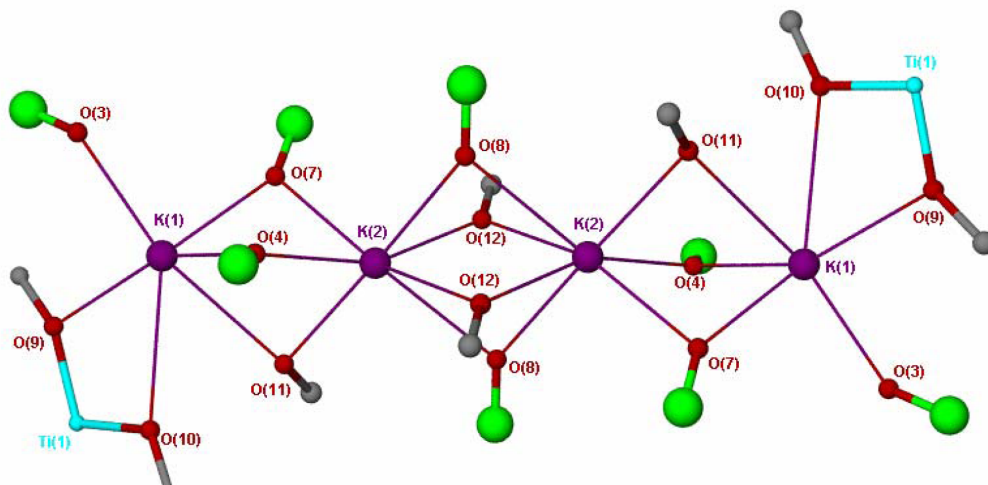

**Figure S1.** Linear tetramers of potassium ions, the core repeating component of the structure of complex 1.

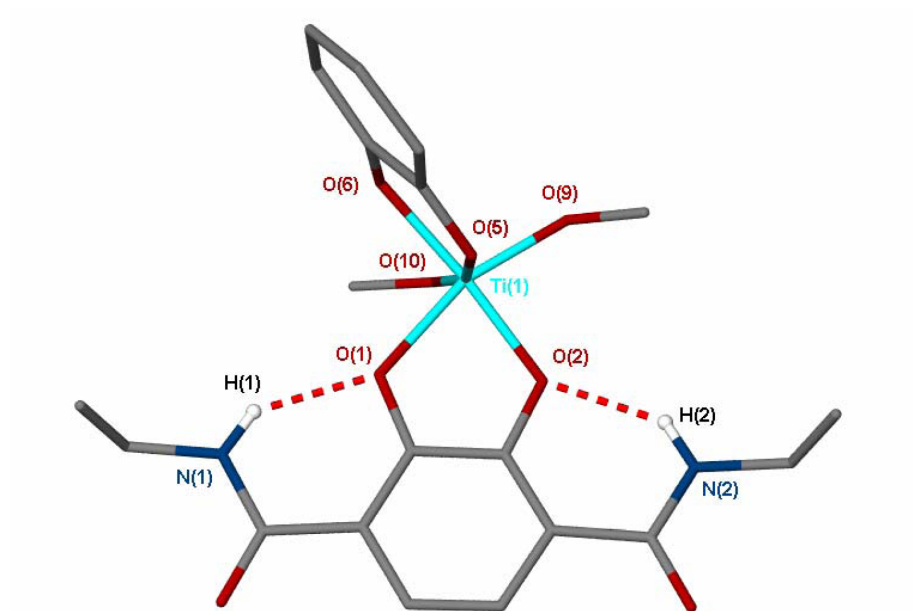

**Figure S2.** Intra-molecular hydrogen bonding between the N-H $\cdots$ O(catechol) in the structure of complex **1**.

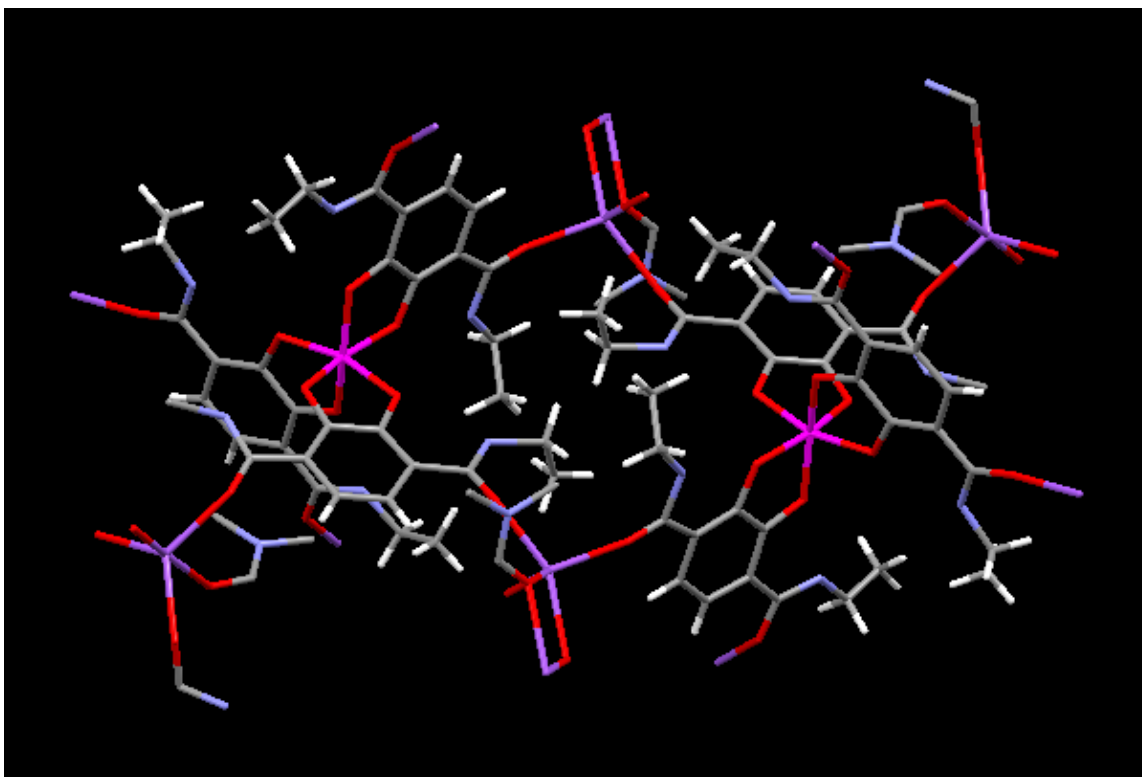

**Figure S3** Structure of Na<sub>2</sub>[Ti(etTAM)<sub>3</sub>] (**3**) complex. The R-factor is >15%, hence the structure was only used to illustrate the connectivity of the ligands to the Ti.

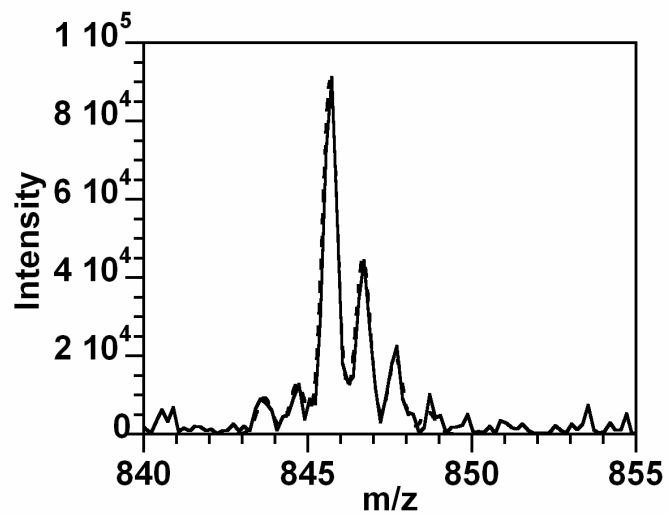

**Figure S4.** ESI-MS of complex **3** in water showing peaks consistent with titanium isotope distributions for  $\text{Na}_2\text{H}[\text{Ti}(\text{etTAM})_3]^+$  (peaks  $\sim 845.5$  m/z). Experimental spectrum, solid line; simulated titanium isotope distributions, dashed line.

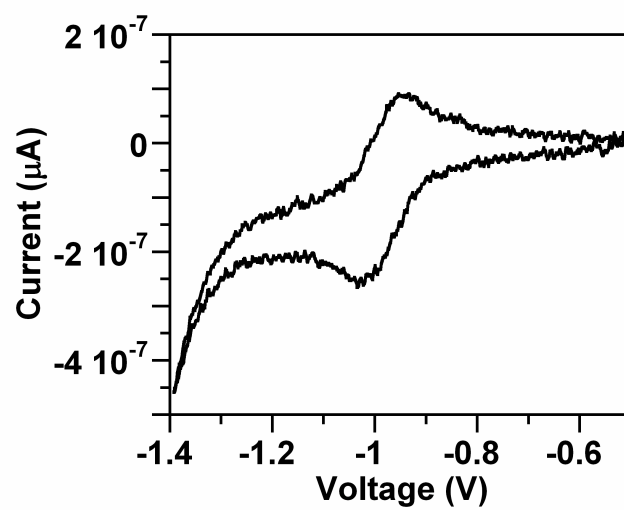

**Figure S5.** Cyclic voltammetric trace of 4 mM complex **1** in 20% MeCN/80% H<sub>2</sub>O in the presence of 0.1 M KNO<sub>3</sub> using a hanging mercury drop electrode.

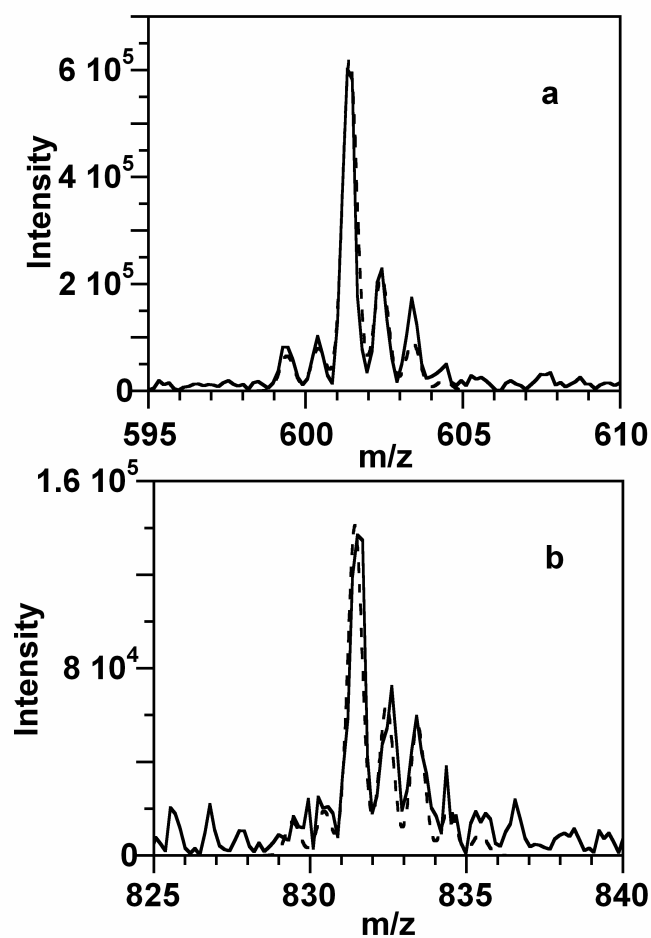

**Figure S6.** ESI-MS of complex **2** in water showing peaks consistent with titanium isotope distributions for (a)  $\text{Na}_2\text{H}[\text{Ti}(\text{meTAM})_2(\text{OCH}_3)_2]^+$  (peaks  $\sim 601$  m/z) where the  $\text{Na}^+$  are provided by the instrument and (b)  $\text{K}_3[\text{Ti}(\text{meTAM})_3]^+$  (peaks  $\sim 831$  m/z). Experimental spectrum, solid line; simulated titanium isotope distributions, dashed line.



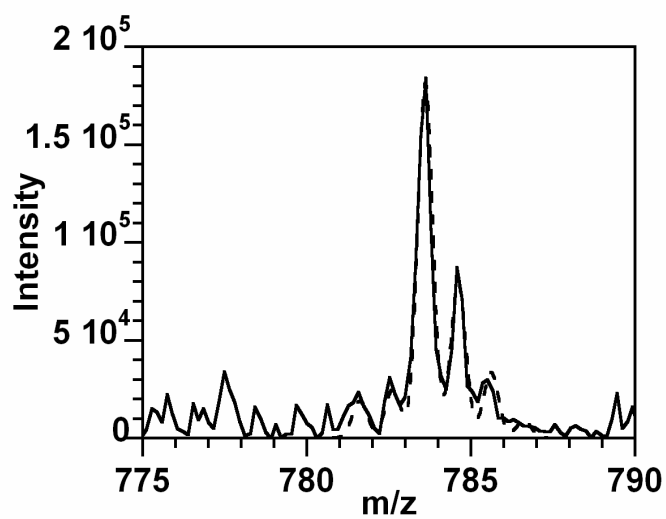

**Figure S7.** ESI-MS of complex **4** in water showing peaks consistent with titanium isotope distributions for  $\text{Na}_3[\text{Ti}(\text{meTAM})_3]^+$  (peaks  $\sim 783$  m/z). Experimental spectrum, solid line; simulated titanium isotope distributions, dashed line.

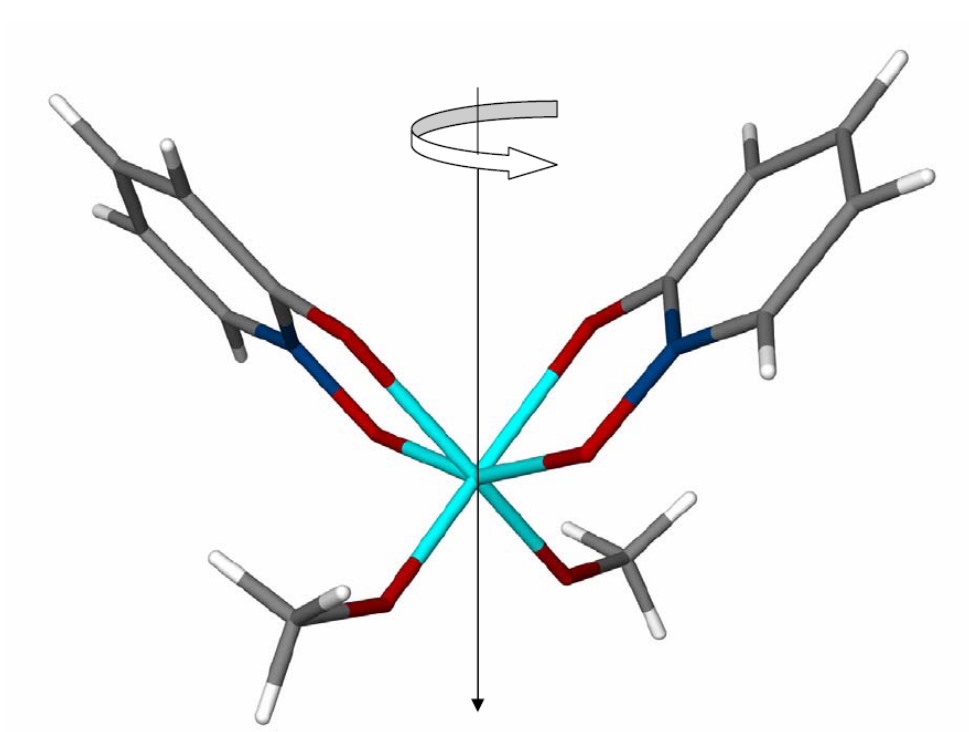

**Figure S8.** The structure showing pseudo-two-fold axis of rotation of complex **5**.

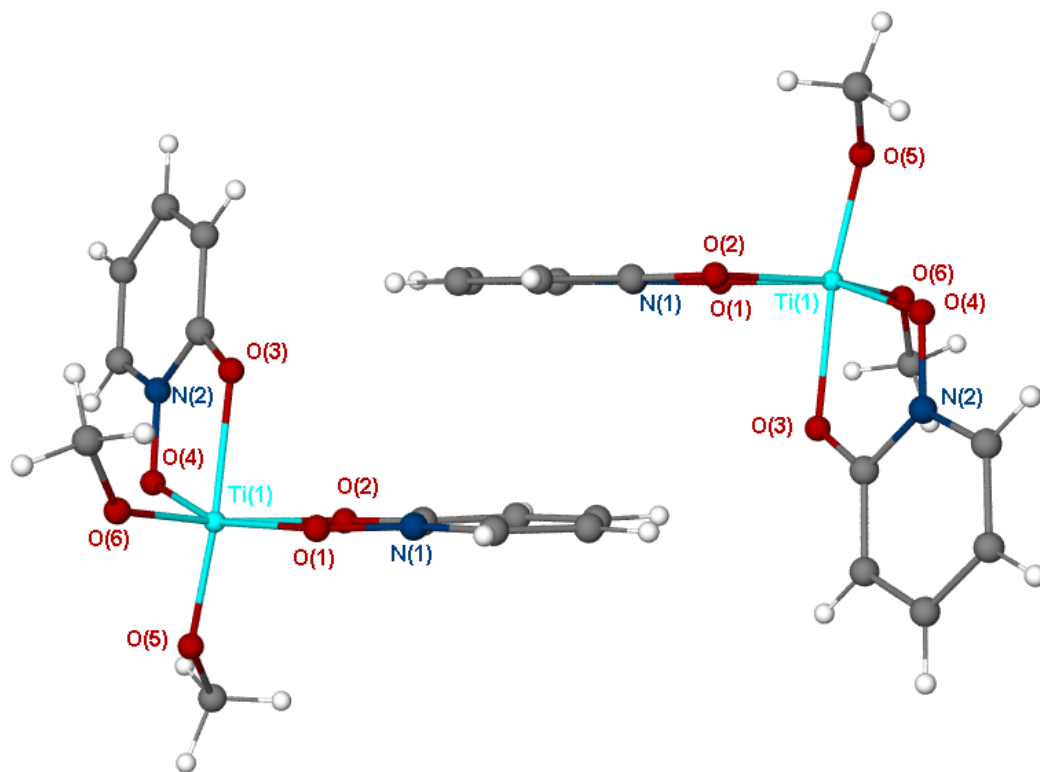

**Figure S9.** Ball and stick model showing  $\pi$ -stacking between the phenyl rings of different molecules in the X-ray crystal structure of complex **5**.

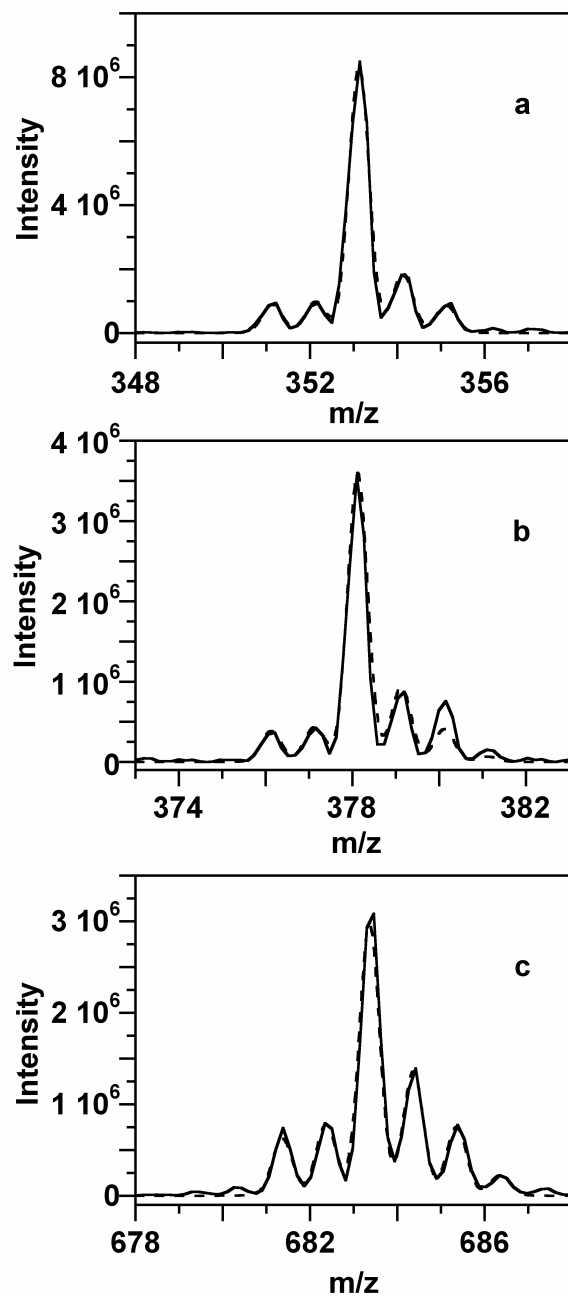

**Figure S10.** ESI-MS of complex **5** in water showing peaks consistent with titanium isotope distributions for (a)  $\text{Na}[\text{Ti}(\text{1,2-HOPO})_2(\text{OCH}_3)_2]^+$  (peaks  $\sim 353$   $m/z$ ), (b)  $[\text{Ti}(\text{1,2-HOPO})_3]^+$  (peaks  $\sim 378$   $m/z$ ) and (c)  $[\text{Ti}_2(\text{1,2-HOPO})_4(\text{OCH}_3)(\text{OH})(\text{acac})]^+$  (peaks  $\sim 683$   $m/z$ ). Experimental spectrum, solid line; simulated titanium isotope distributions, dashed line.

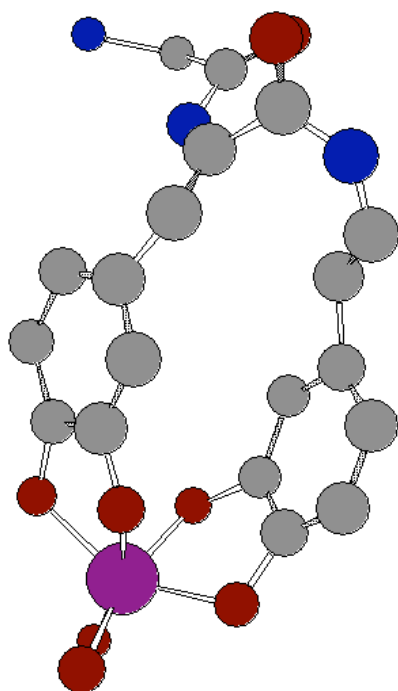

**Figure S11.** Ball and stick model showing the hypothetical binding of Mm-1 to Ti(IV). Spheres in the structure represent; purple, titanium; red, oxygen; grey, carbon; blue, nitrogen. Hydrogen atoms are not shown in the figure. The energy was minimized using the molecular mechanics algorithm in Chem 3D.
